# Supplementary material for: Synthesis and Antibacterial Activity of Polyalthic Acid Analogs
Source: MDPI journal article supplement (doi:10.3390/antibiotics12071202), 2023-07-19
Supplement: s1 [file s1]

## Supporting Information

### Synthesis and Antibacterial Activity of Polyalthic Acid Analogs

Table of contents:

Susceptibility profile of the Gram-positive and Gram-negative strains tested in this study using antibiotics currently available in the market.

Determination of MIC of PA, daptomycin, **2a** and **3a** by analysis of the kinetic growth of gram-positive bacteria

<sup>1</sup>H and <sup>13</sup>C NMR data

Table S1. Susceptibility profile of the Gram-positive strains tested in this study using antibiotics currently available in the market.

| Antibiotics                   | <i>S. epidermidis</i> ATCC 35984 |                | <i>S. aureus</i> ATCC 25923 |                | <i>S. aureus</i> ATCC 8095 |                | <i>E. faecalis</i> ATCC 292 |                |
|-------------------------------|----------------------------------|----------------|-----------------------------|----------------|----------------------------|----------------|-----------------------------|----------------|
|                               | MIC                              | interpretation | MIC                         | interpretation | MIC                        | interpretation | MIC                         | interpretation |
| Ampicillin                    | >4                               | R              | N.R.                        | N.R.           | N.R.                       | N.R.           | ≤2                          | S              |
| Cefoxitin                     | ≤0.5                             | R              | ≤1                          | S              | 2                          | S              | N.R.                        | N.R.           |
| Ceftaroline                   | N.R.                             | N.R.           | ≤0.5                        | S              | ≤0.5                       | S              | N.R.                        | N.R.           |
| Ciprofloxacin                 | ≤0.5                             | I              | ≤0.5                        | S              | ≤0.5                       | S              | 1                           | S              |
| Clindamycin                   | >2                               | R              | ≤0.5                        | S              | ≤0.5                       | S              | N.R.                        | N.R.           |
| Chloramphenicol               | N.R.                             | N.R.           | 8                           | S              | 8                          | S              | N.R.                        | N.R.           |
| Daptomycin                    | ≤1                               | S              | ≤1                          | S              | ≤1                         | S              | N.R.                        | N.R.           |
| Erythromycin                  | >4                               | R              | ≤0.25                       | S              | ≤0.25                      | S              | N.R.                        | N.R.           |
| Streptomycin-Sin              | N.R.                             | N.R.           | N.R.                        | N.R.           | N.R.                       | N.R.           | >1000                       | R              |
| Gentamicin                    | >8                               | R              | ≤2                          | S              | ≤2                         | S              | N.R.                        | N.R.           |
| Gentamicin-Sin                | N.R.                             | N.R.           | N.R.                        | N.R.           | N.R.                       | N.R.           | ≤500                        | S              |
| Linezolid                     | 2                                | S              | ≤1                          | S              | ≤1                         | S              | 2                           | S              |
| Minocycline                   | ≤1                               | S              | ≤1                          | S              | ≤1                         | S              | N.R.                        | N.R.           |
| Nitrofurantoin                | N.R.                             | N.R.           | N.R.                        | N.R.           | N.R.                       | N.R.           | ≤16                         | S              |
| Oxacillin                     | >2                               | R              | ≤0.25                       | S              | 0.5                        | S              | N.R.                        | N.R.           |
| Penicillin G                  | >1                               | R              | ≤0.125                      | S              | ≤0.125                     | S              | N.R.                        | N.R.           |
| Teicoplanin                   | ≤2                               | S              | ≤1                          | S              | ≤1                         | S              | ≤1                          | S              |
| Trimethoprim-Sulfamethoxazole | >2/38                            | R              | ≤0.5/9.5                    | S              | ≤0.5/9.5                   | S              | N.R.                        | N.R.           |
| Vancomycin                    | 1                                | S              | 1                           | S              | 1                          | S              | 2                           | S              |

\*N.R. – not reported, either because the MIC is reported only with no interpretation, or the test is not reported because there is insufficient information to have a breakpoint; S -Susceptible; I- Susceptible increased exposure; R- Resistant.

Table S2. Susceptibility profile of the Gram-negative strains tested in this study using antibiotics currently available in the market.

\*N.R. – not reported, either because the MIC is reported only with no interpretation, or the test

| Antibiotics                   | <i>K. pneumoniae</i> ATCC 700603 |                | <i>E. coli</i> ATCC 25922 |                | <i>A. baumannii</i> ATCC 19606 |                |
|-------------------------------|----------------------------------|----------------|---------------------------|----------------|--------------------------------|----------------|
|                               | MIC                              | interpretation | MIC                       | interpretation | MIC                            | interpretation |
| Amikacin                      | ≤4                               | S              | ≤4                        | S              | >16                            | R              |
| Ampicillin-Sulbactam          | 16/8                             | I              | ≤4/2                      | S              | N.R.                           | N.R.           |
| Cefepime                      | 2                                | S              | ≤1                        | S              | N.R.                           | N.R.           |
| Ceftazidime                   | >8                               | R              | ≤1                        | S              | N.R.                           | N.R.           |
| Ceftazidime-Avibactam         | 1/4                              | S              | ≤0.25/4                   | S              | N.R.                           | N.R.           |
| Ceftolozano-Tazobactam        | ≤1/4                             | S              | ≤1/4                      | S              | 4/4                            | N.R.           |
| Ceftriaxone                   | 4                                | R              | ≤1                        | S              | N.R.                           | N.R.           |
| Cefuroxime                    | >16                              | R              | ≤4                        | S              | N.R.                           | N.R.           |
| Ciprofloxacin                 | 0.5                              | I              | ≤0.25                     | S              | 1                              | I              |
| Colistin                      | ≤1                               | S              | ≤1                        | S              | ≤1                             | S              |
| Ertapenem                     | ≤0.25                            | S              | ≤0.25                     | S              | N.R.                           | N.R.           |
| Gentamicin                    | >4                               | R              | ≤1                        | S              | >4                             | R              |
| Imipenem                      | ≤0.25                            | S              | ≤0.25                     | S              | 8                              | R              |
| Levofloxacin                  | 1                                | I              | ≤0.5                      | S              | ≤0.5                           | S              |
| Meropenem                     | ≤0,5                             | S              | ≤0.5                      | S              | 1                              | S              |
| Piperacillin-Tazobactam       | 16/4                             | S              | ≤4/4                      | S              | N.R.                           | N.R.           |
| Trimethoprim-Sulfamethoxazole | ≤1/19                            | S              | ≤1/19                     | S              | >4/76                          | R              |

is not reported because there is insufficient information to have a breakpoint; S -Susceptible; I- Susceptible increased exposure; R- Resistant.

2a - *E. faecalis* ATCC 29212

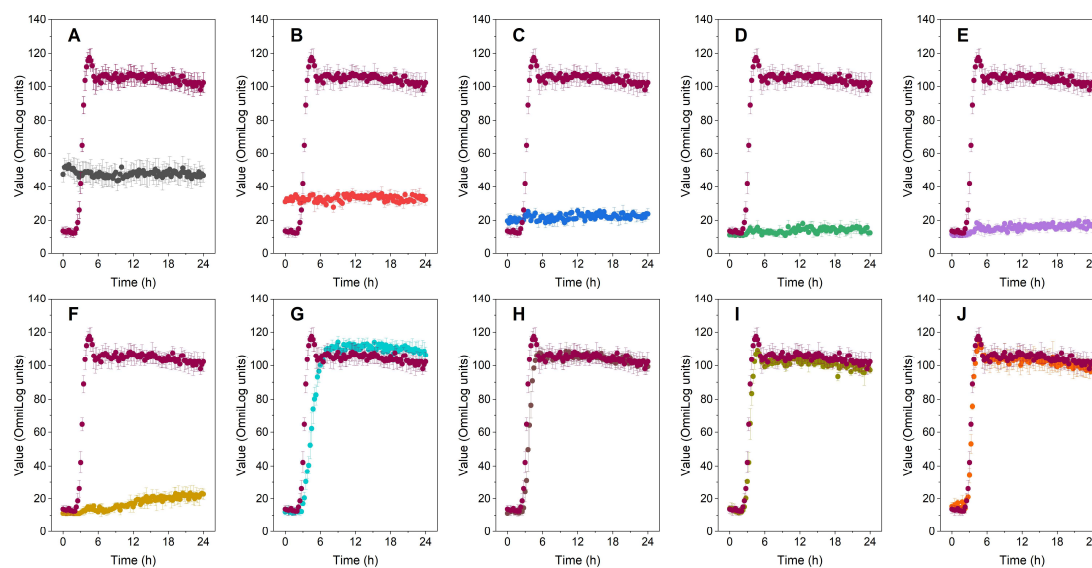

**Figure S1.** Determination of the MIC of 2a against *E. faecalis* ATCC 29212 by a kinetic growth assay. A - 512 mg/L, B - 256 mg/L, C - 128 mg/L, D - 64 mg/L, E - 32 mg/L, F - 16 mg/L, G - 8 mg/L, H - 4 mg/L, I - 2 mg/L, J - 1 mg/L. The MIC was observed at 16 mg/L.

2a - *E. faecium* ATCC 700221

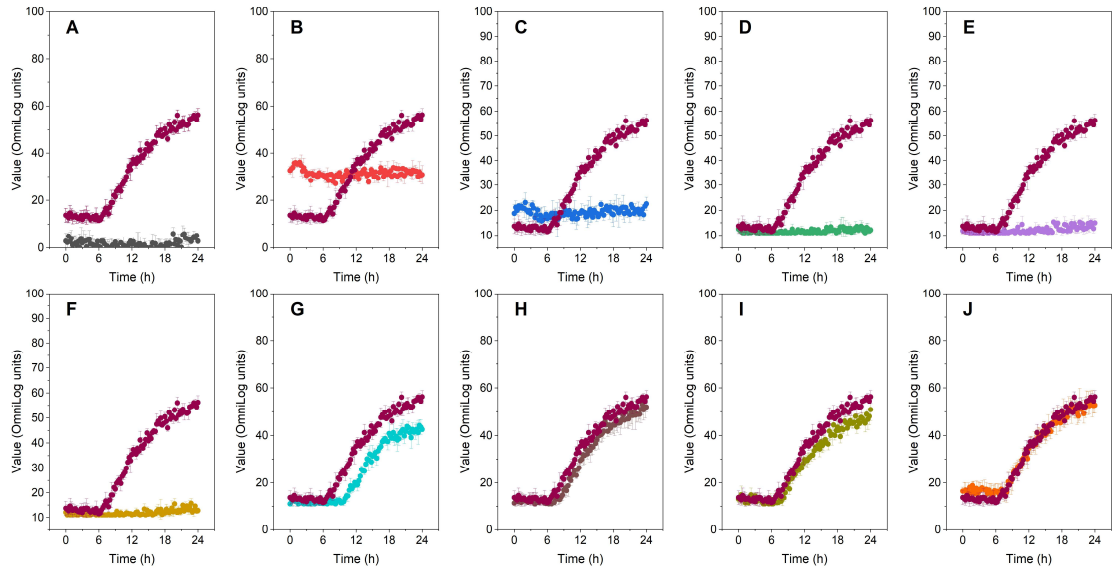

**Figure S2.** Determination of the MIC of **2a** against *E. faecium* ATCC 700221. A - 512 mg/L, B - 256 mg/L, C - 128 mg/L, D - 64 mg/L, E - 32 mg/L, F - 16 mg/L, G - 8 mg/L, H - 4 mg/L, I - 2 mg/L, J - 1 mg/L. The MIC was observed at 16 mg/L.



2a - *S. aureus* ATCC 8095

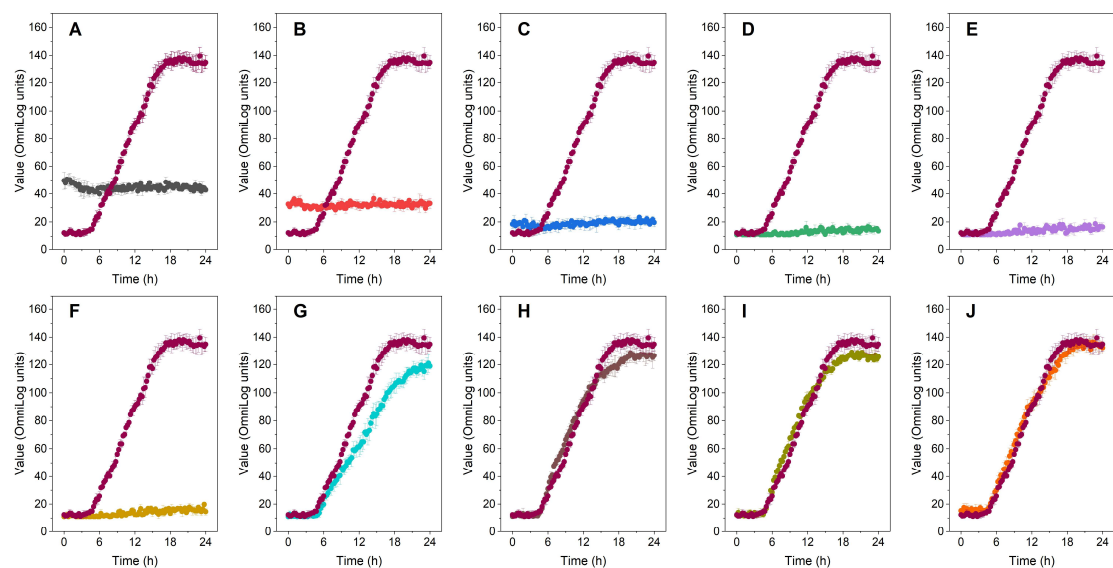

**Figure S3.** Determination of the MIC of **2a** against *S. aureus* ATCC 8095. A - 512 mg/L, B - 256 mg/L, C - 128 mg/L, D - 64 mg/L, E - 32 mg/L, F - 16 mg/L, G - 8 mg/L, H - 4 mg/L, I - 2 mg/L, J - 1 mg/L. The MIC was observed at 16 mg/L.

2a - *S. aureus* ATCC 25923

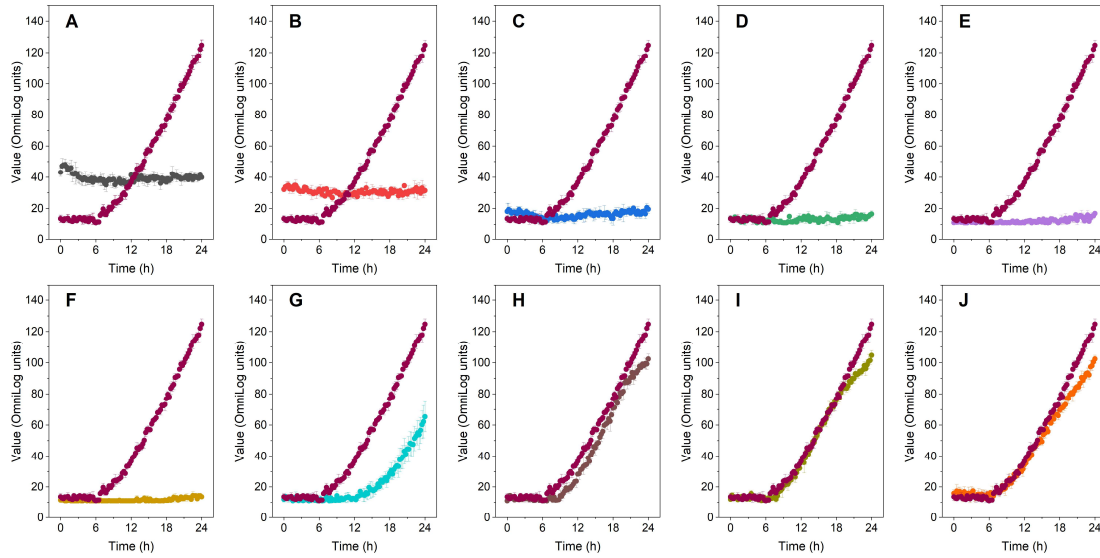

**Figure S4.** Determination of the MIC of **2a** against *S. aureus* ATCC 25923. A - 512 mg/L, B - 256 mg/L, C - 128 mg/L, D - 64 mg/L, E - 32 mg/L, F - 16 mg/L, G - 8 mg/L, H - 4 mg/L, I - 2 mg/L, J - 1 mg/L. The MIC was observed at 16 mg/L.

2a - *S. epidermidis* ATCC 35984

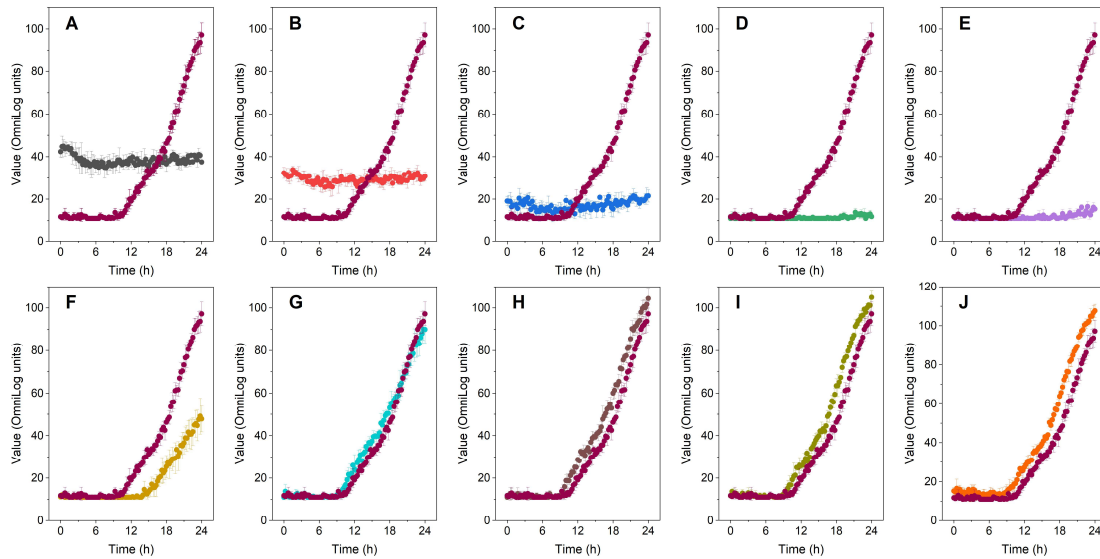

**Figure S5.** Determination of MIC of **2a** against *S. epidermidis* ATCC 35984. A - 512 mg/L, B - 256 mg/L, C - 128 mg/L, D - 64 mg/L, E - 32 mg/L, F - 16 mg/L, G - 8 mg/L, H - 4 mg/L, I - 2 mg/L, J - 1 mg/L. The MIC was observed at 32 mg/L.

3a - *E. faecalis* ATCC 29212

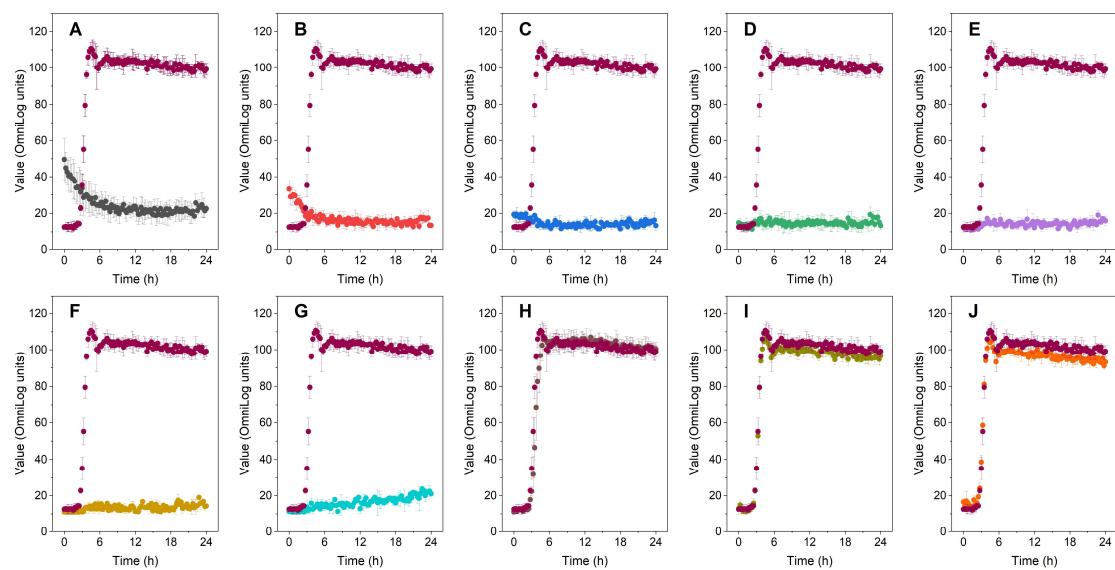

**Figure S6.** Determination of the MIC of **3a** against *E. faecalis* ATCC 29212. A - 512 mg/L, B - 256 mg/L, C - 128 mg/L, D - 64 mg/L, E - 32 mg/L, F - 16 mg/L, G - 8 mg/L, H - 4 mg/L, I - 2 mg/L, J - 1 mg/L. The MIC was observed at 8 mg/L.

3a - *E. faecium* ATCC 700221

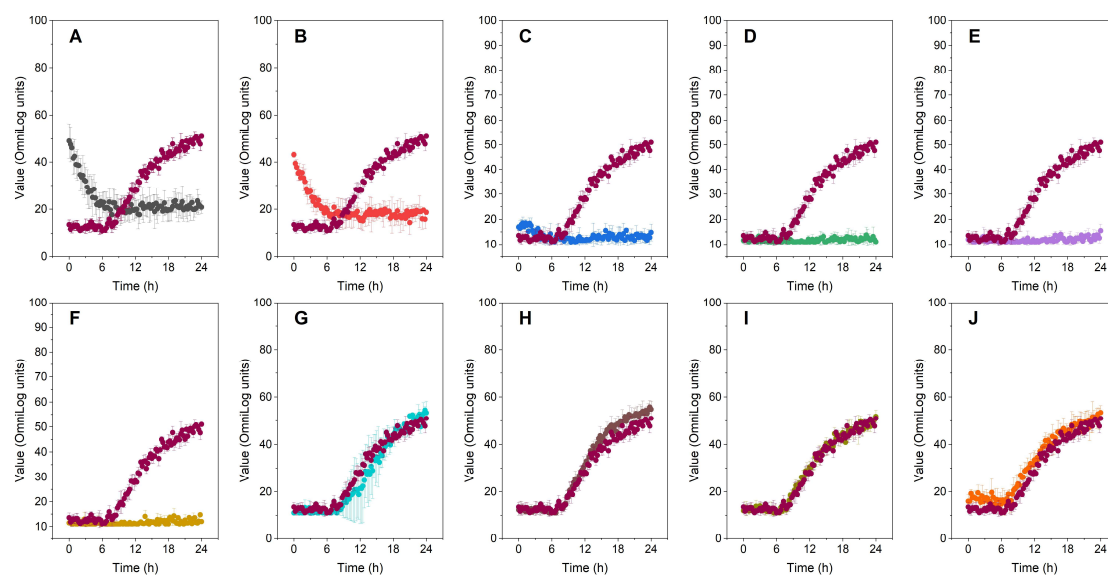

**Figure S7.** Determination of the MIC of **3a** against *E. faecium* ATCC 700221. A - 512 mg/L, B - 256 mg/L, C - 128 mg/L, D - 64 mg/L, E - 32 mg/L, F - 16 mg/L, G - 8 mg/L, H - 4 mg/L, I - 2 mg/L, J - 1 mg/L. The MIC was observed at 16 mg/L.

3a - *S. aureus* ATCC 8095

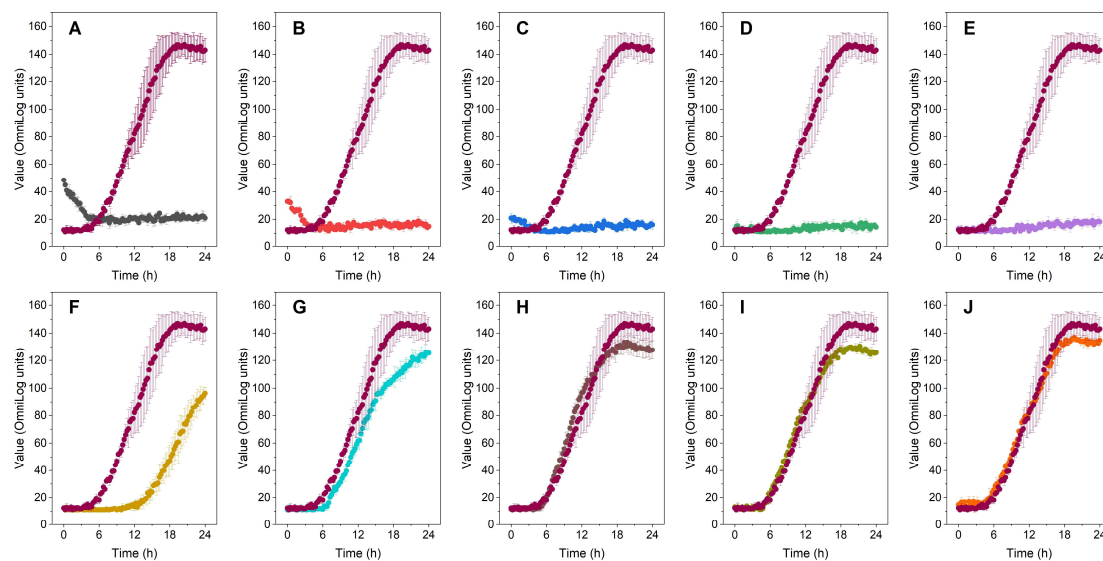

**Figure S8.** Determination of the MIC of **3a** against *S. aureus* ATCC 8095. A - 512 mg/L, B - 256 mg/L, C - 128 mg/L, D - 64 mg/L, E - 32 mg/L, F - 16 mg/L, G - 8 mg/L, H - 4 mg/L, I - 2 mg/L, J - 1 mg/L. The MIC was observed at 32 mg/L.

3a - *S. aureus* ATCC 25923

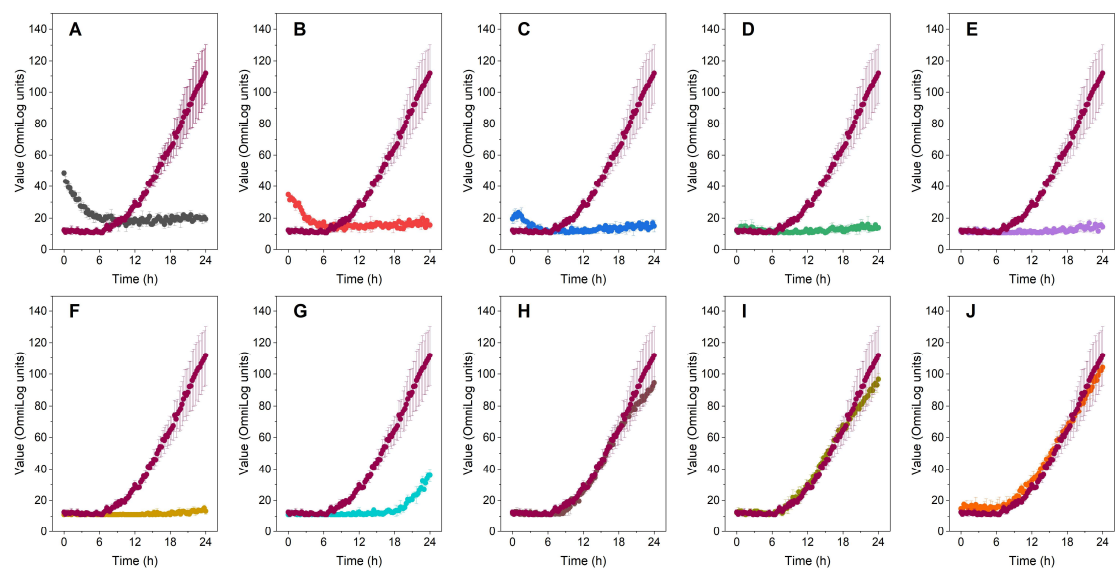

**Figure S9.** Determination of the MIC of **3a** against *S. aureus* ATCC 25923. A - 512 mg/L, B - 256 mg/L, C - 128 mg/L, D - 64 mg/L, E - 32 mg/L, F - 16 mg/L, G - 8 mg/L, H - 4 mg/L, I - 2 mg/L, J - 1 mg/L. The MIC was observed at 16 mg/L.

3a - *S. epidermidis* ATCC 35984

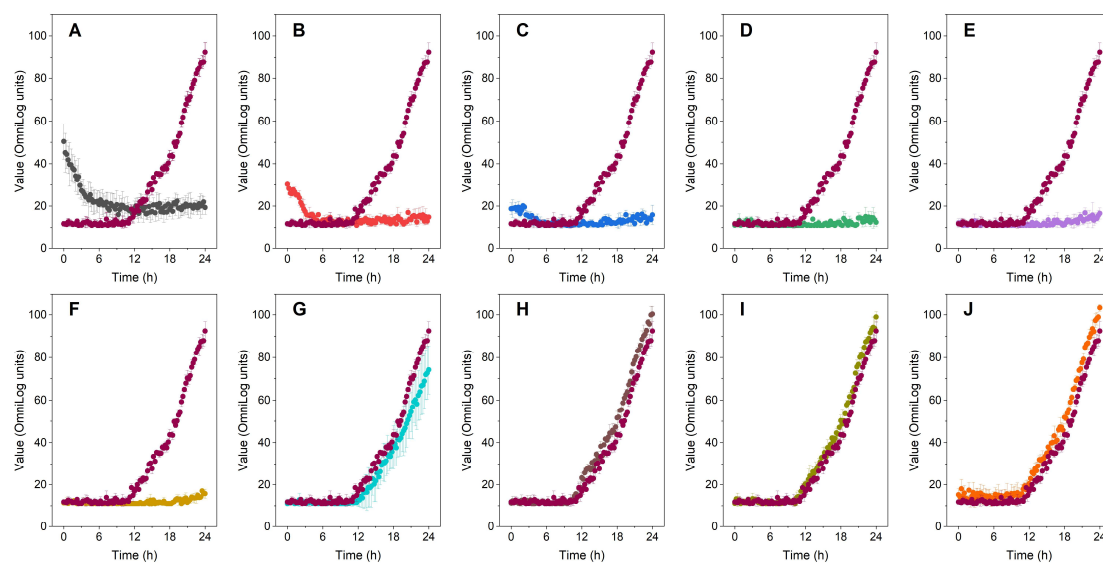

**Figure S10.** Determination of the MIC of **3a** against *S. epidermidis* ATCC 35984. A - 512 mg/L, B - 256 mg/L, C - 128 mg/L, D - 64 mg/L, E - 32 mg/L, F - 16 mg/L, G - 8 mg/L, H - 4 mg/L, I - 2 mg/L, J - 1 mg/L. The MIC was observed at 16 mg/L.

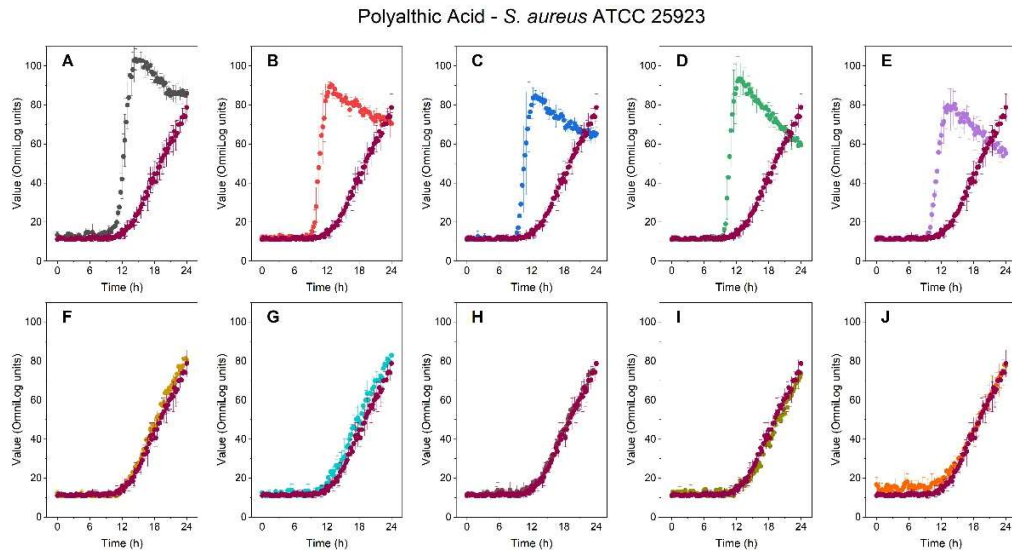

**Figure S11.** Determination of the minimal inhibitory concentration (MIC) of Polyalthic Acid against *S. aureus* ATCC 25923 by a kinetic growth assay. A - 512 mg/L, B - 256 mg/L, C - 128 mg/L, D - 64 mg/L, E - 32 mg/L, F - 16 mg/L, G - 8 mg/L, H - 4 mg/L, I - 2 mg/L, J - 1 mg/L. MIC was not observed (> 512 mg/L).



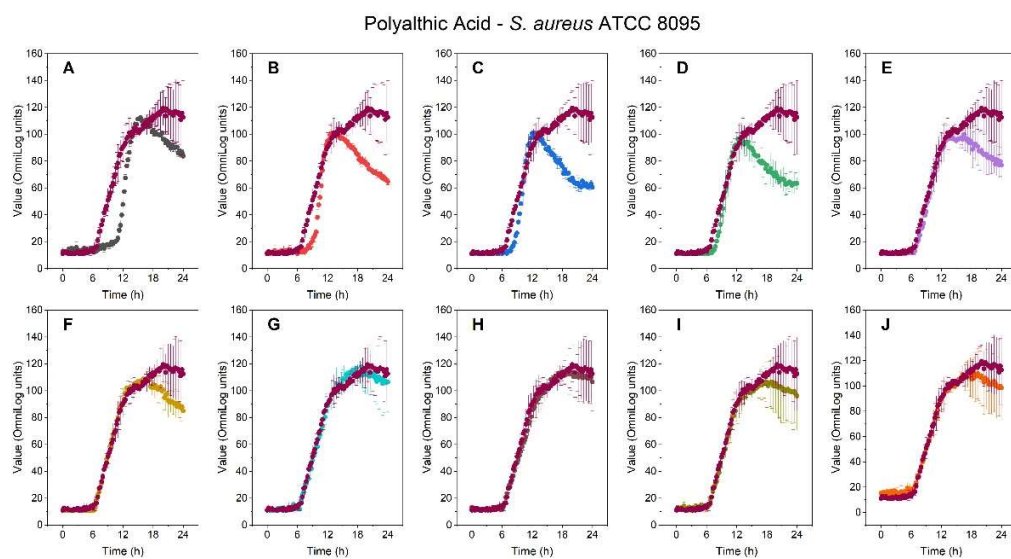

**Figure S12.** Determination of the minimal inhibitory concentration (MIC) of Polyalthic Acid against *S. aureus* ATCC 8095 by a kinetic growth assay. A - 512 mg/L, B - 256 mg/L, C - 128 mg/L, D - 64 mg/L, E - 32 mg/L, F - 16 mg/L, G - 8 mg/L, H - 4 mg/L, I - 2 mg/L, J - 1 mg/L. MIC was not observed (> 512 mg/L).

Polyalthic Acid - *E. faecalis* ATCC 29212

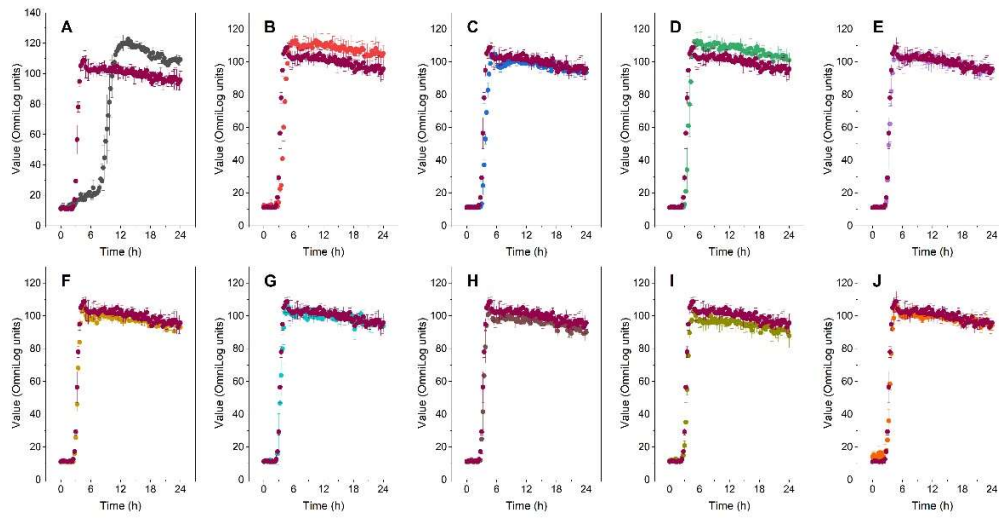

**Figure S13.** Determination of the minimal inhibitory concentration (MIC) of Polyalthic Acid against *E. faecalis* ATCC 29212 by a kinetic growth assay. A - 512 mg/L, B - 256 mg/L, C - 128 mg/L, D - 64 mg/L, E - 32 mg/L, F - 16 mg/L, G - 8 mg/L, H - 4 mg/L, I - 2 mg/L, J - 1 mg/L. MIC was not observed (> 512 mg/L).

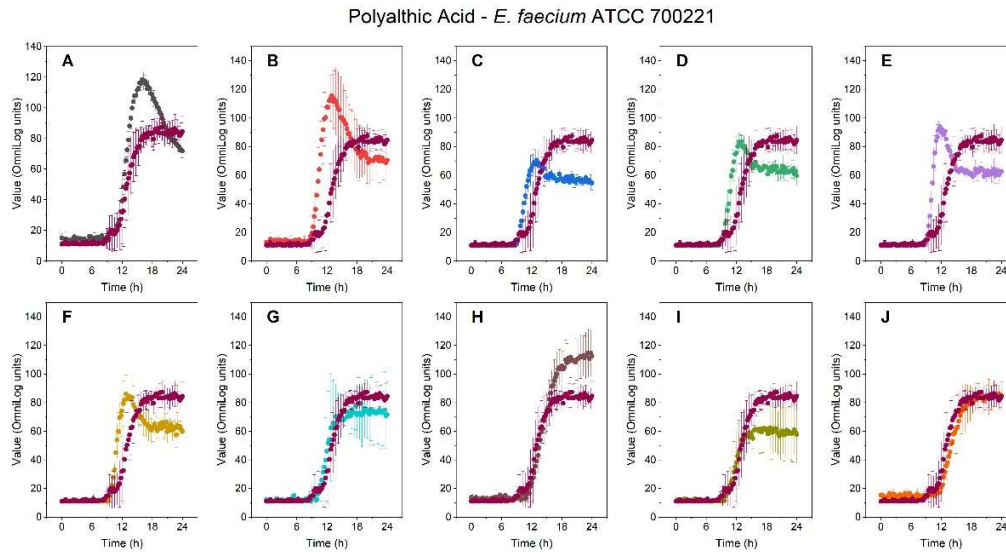

**Figure S14.** Determination of the minimal inhibitory concentration (MIC) of Polyalthic Acid against *E. faecium* ATCC 700221 by a kinetic growth assay. A - 512 mg/L, B - 256 mg/L, C - 128 mg/L, D - 64 mg/L, E - 32 mg/L, F - 16 mg/L, G - 8 mg/L, H - 4 mg/L, I - 2 mg/L, J - 1 mg/L. MIC was not observed (> 512 mg/L).

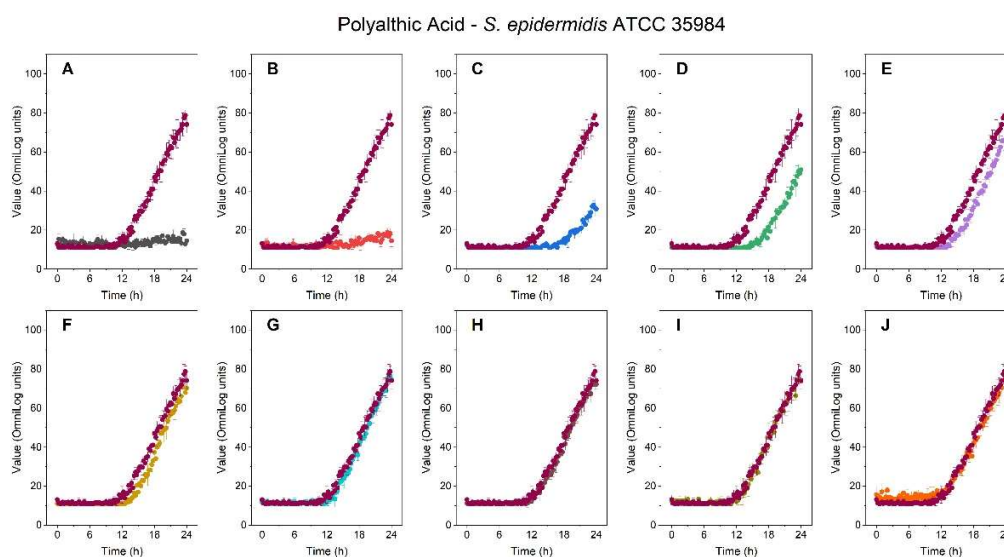

**Figure S15.** Determination of the minimal inhibitory concentration (MIC) of Polyalthic Acid against *S. epidermidis* ATCC 35984 by a kinetic growth assay. A - 512 mg/L, B - 256 mg/L, C - 128 mg/L, D - 64 mg/L, E - 32 mg/L, F - 16 mg/L, G - 8 mg/L, H - 4 mg/L, I - 2 mg/L, J - 1 mg/L. MIC was observed at 256 mg/L.

# Daptomycin - *S. epidermidis* ATCC 35984

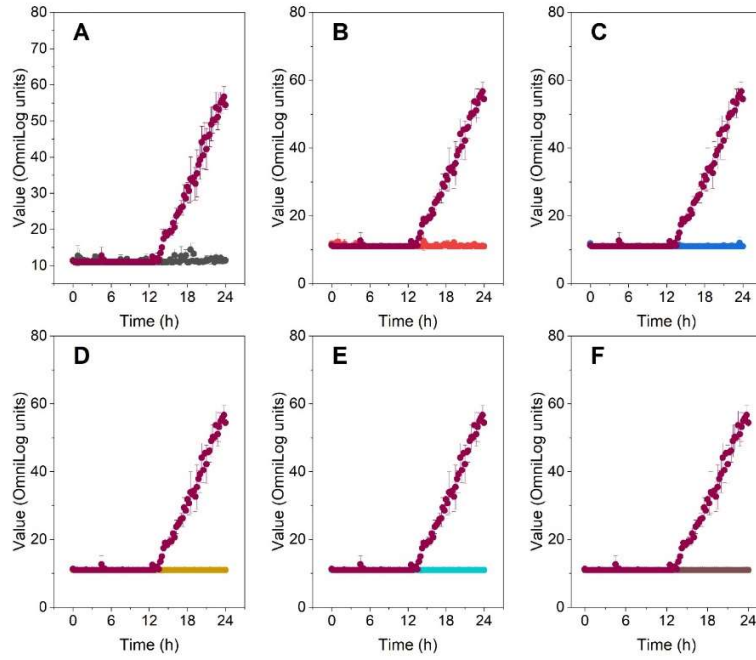

**Figure S16.** Determination of the minimal inhibitory concentration of daptomycin (MIC) against *S. epidermidis* ATCC 35984. A - 4 mg/L, B - 2 mg/L, C - 1 mg/L, D - 0.5 mg/L, E - 0.25 mg/L, F - 0.125 mg/L MIC was < 0.125 mg/L. Figure S11

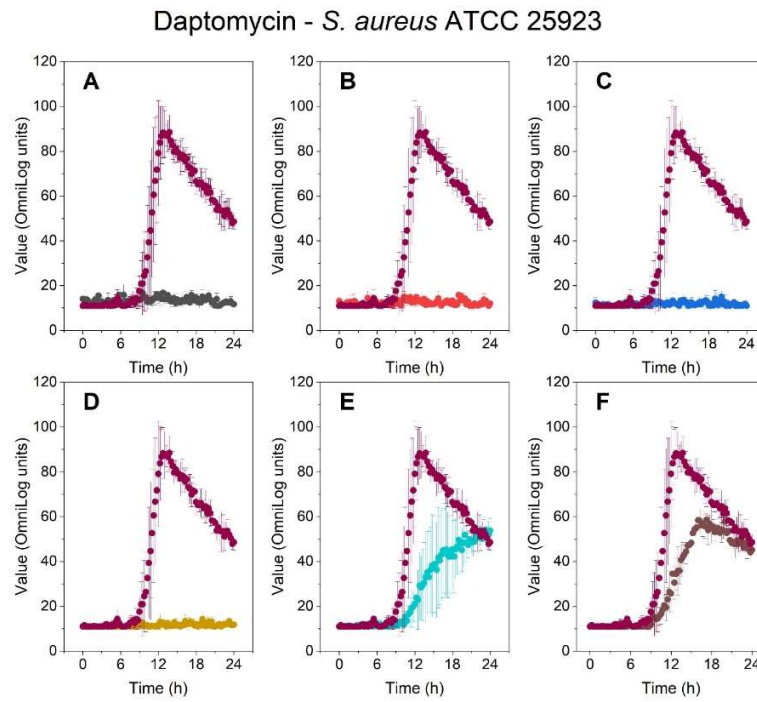

**Figure S17.** Determination of the minimal inhibitory concentration of daptomycin (MIC) against *S. aureus* ATCC 25923. A - 4 mg/L, B - 2 mg/L, C - 1 mg/L, D - 0.5 mg/L, E - 0.25 mg/L, F - 0.125 mg/L. MIC was observed at 0.5 mg/L.

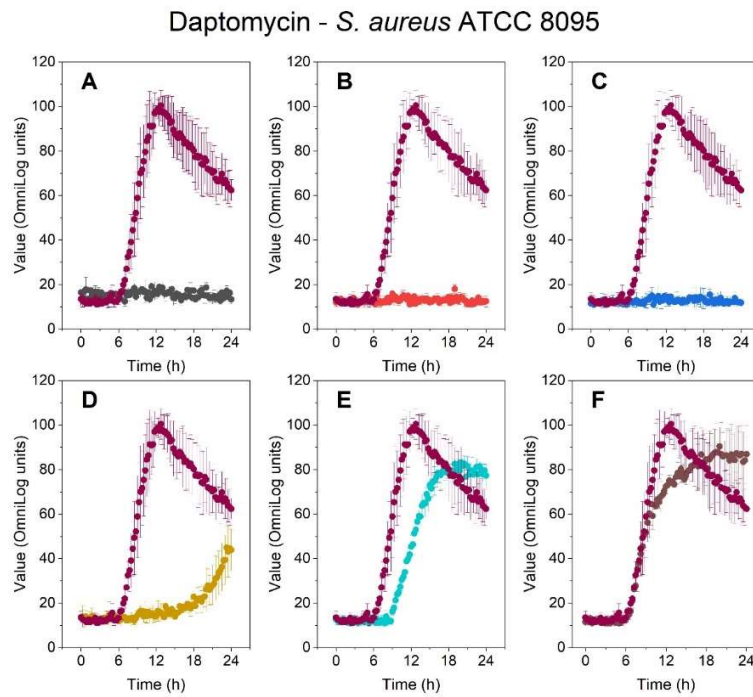

**Figure S18.** Determination of the minimal inhibitory concentration of daptomycin (MIC) against *S. aureus* ATCC 8095. A - 4 mg/L, B - 2 mg/L, C - 1 mg/L, D - 0.5 mg/L, E - 0.25 mg/L, F - 0.125 mg/L MIC was observed at 1 mg/L.

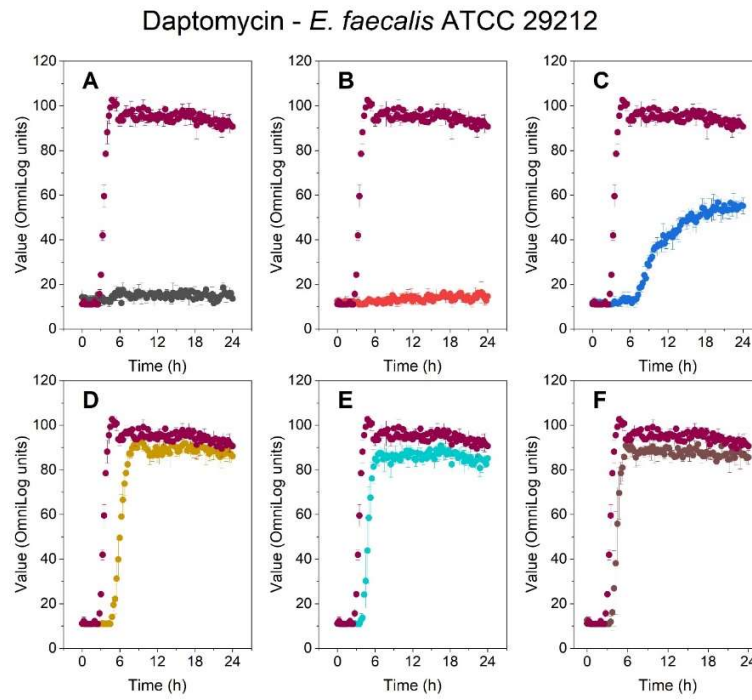

**Figure S19.** Determination of the minimal inhibitory concentration of daptomycin (MIC) against *E. faecalis* ATCC 29212. A - 4 mg/L, B - 2 mg/L, C - 1 mg/L, D - 0.5 mg/L, E - 0.25 mg/L, F - 0.125 mg/L. MIC was observed at 2 mg/L.



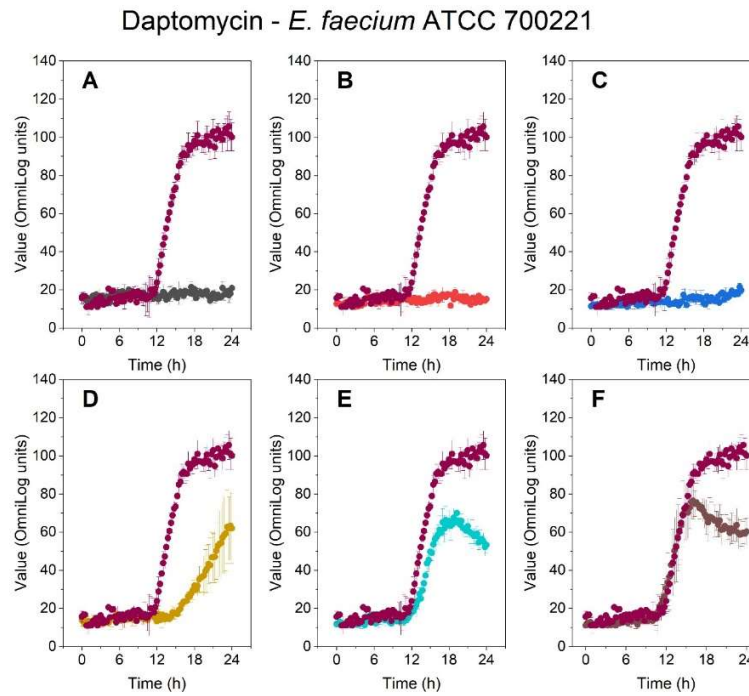

**Figure S20.** Determination of the minimal inhibitory concentration of daptomycin (MIC) against *E. faecium* ATCC 700221. A - 4 mg/L, B - 2 mg/L, C - 1 mg/L, D - 0.5 mg/L, E - 0.25 mg/L, F - 0.125 mg/L. MIC was observed at 1 mg/L.

SpinWorks 4: single\_pulse

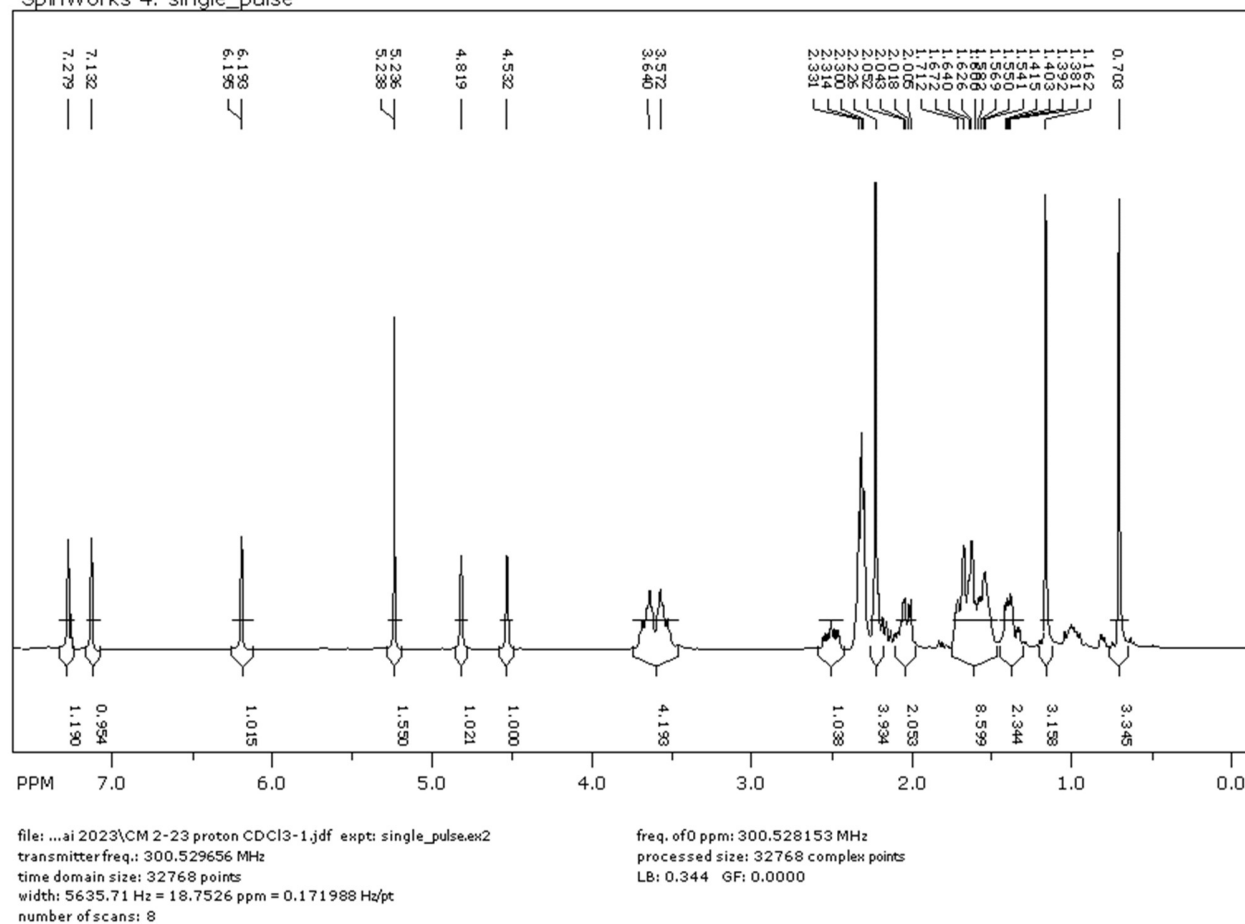

**Figure S21.** <sup>1</sup>H-NMR (300 MHz, CDCl<sub>3</sub>) spectrum of **2a**

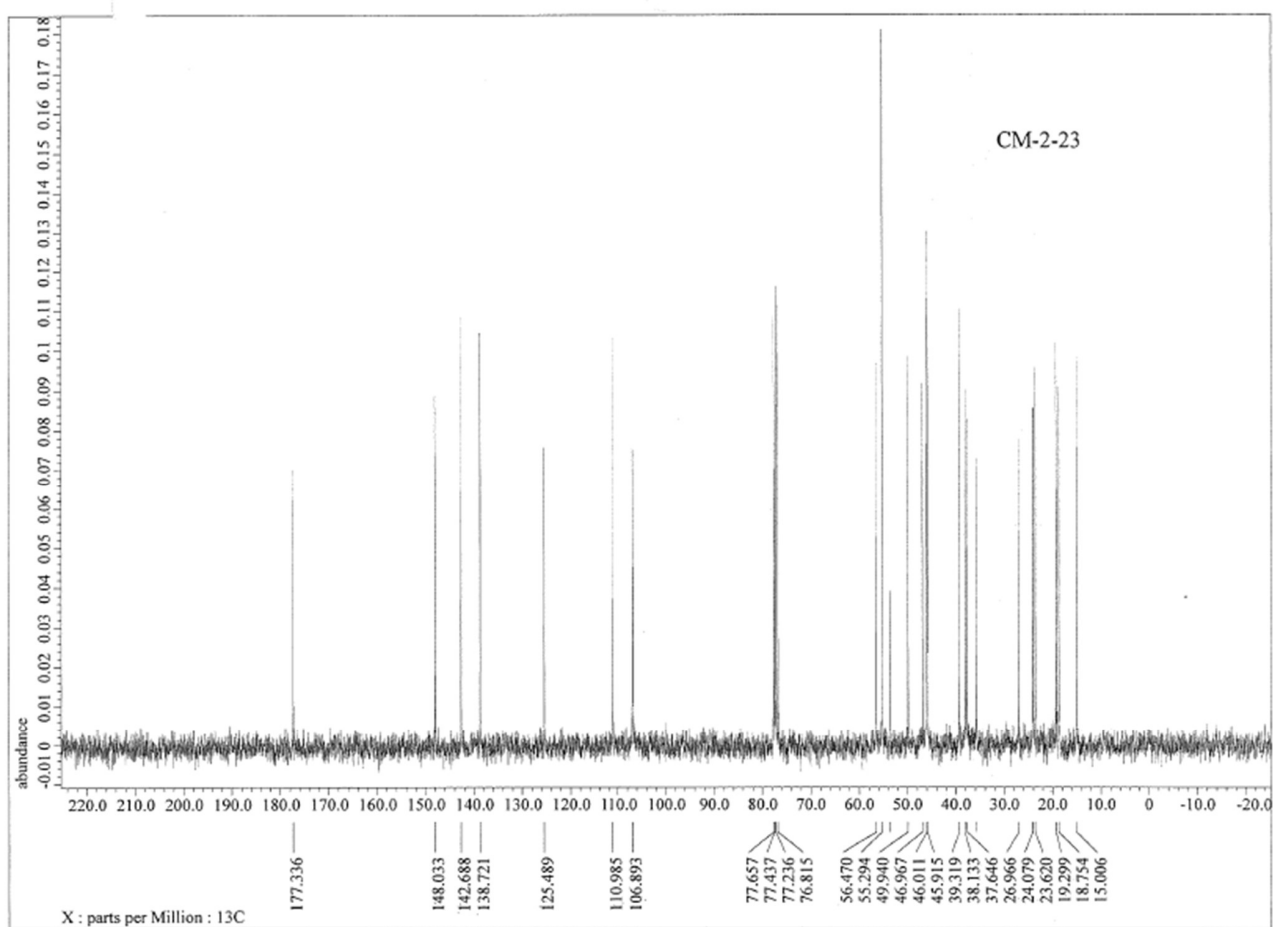

**Figure S22.**  $^{13}\text{C}$ -NMR (75 MHz,  $\text{CDCl}_3$ ) spectrum of **2a**

SpinWorks 4: single\_pulse

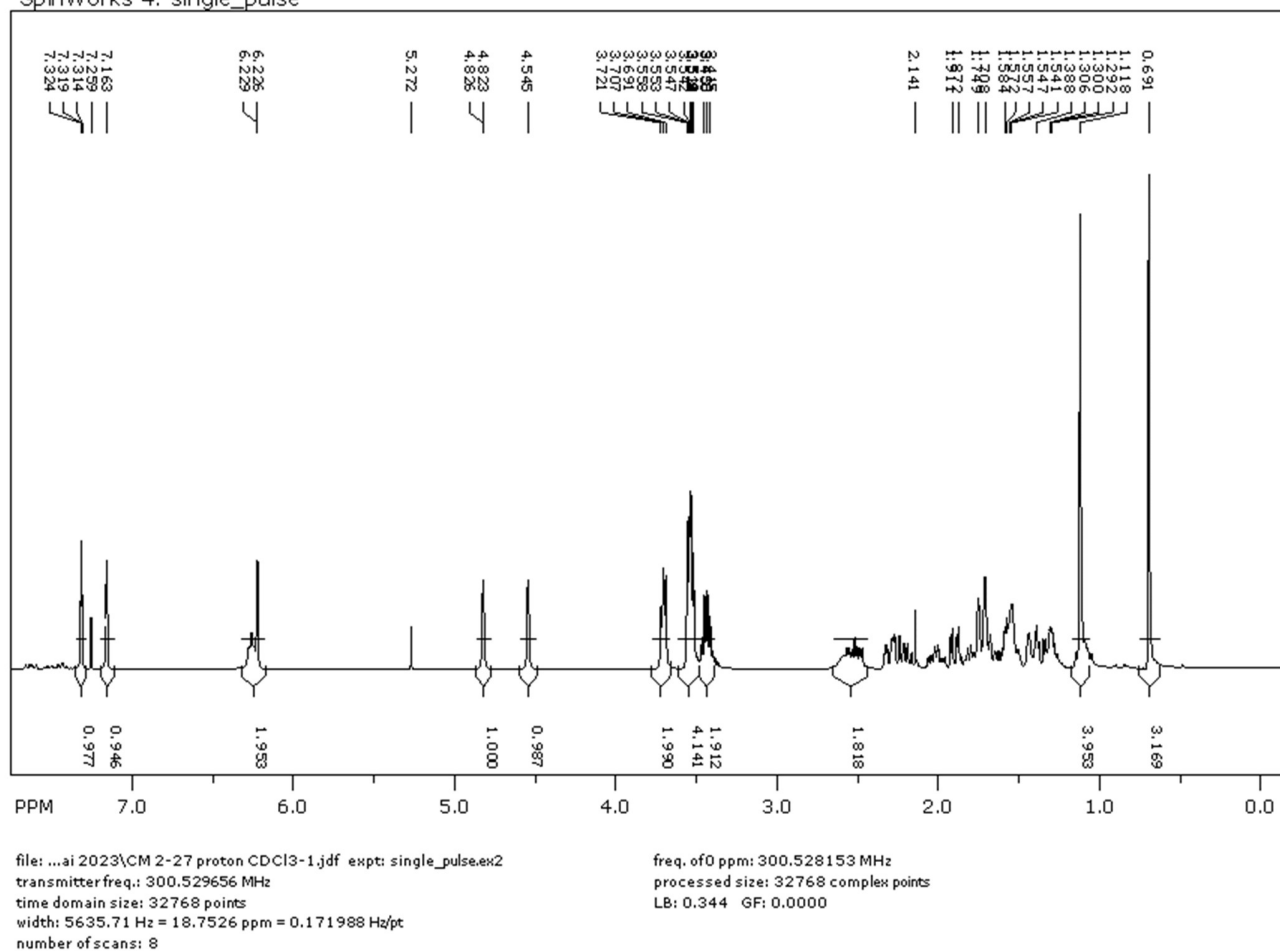

**Figure S23.**  $^1\text{H}$ -NMR (300 MHz,  $\text{CDCl}_3$ ) spectrum of **2b**

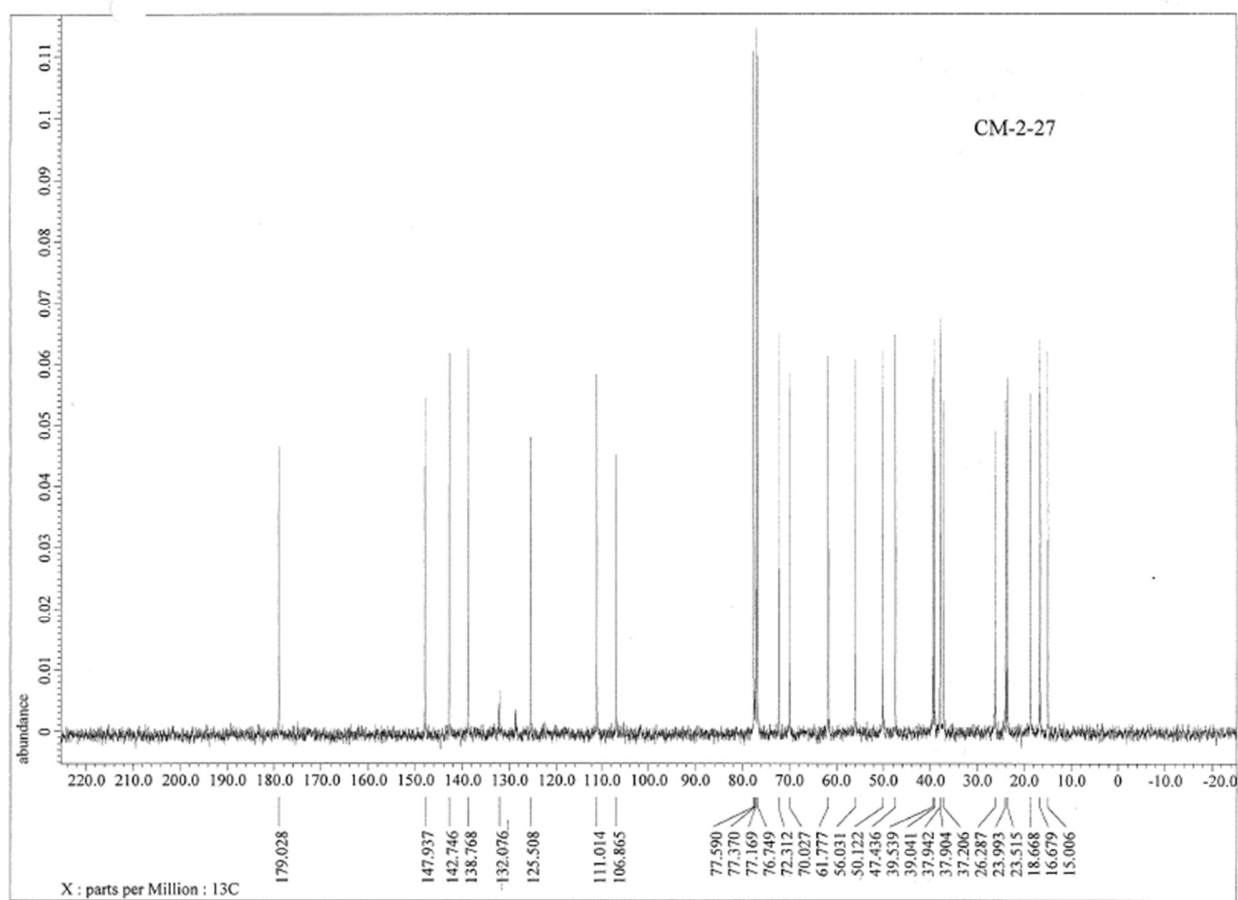

**Figure S24.**  $^{13}\text{C}$ -NMR (75 MHz,  $\text{CDCl}_3$ ) spectrum of **2b**

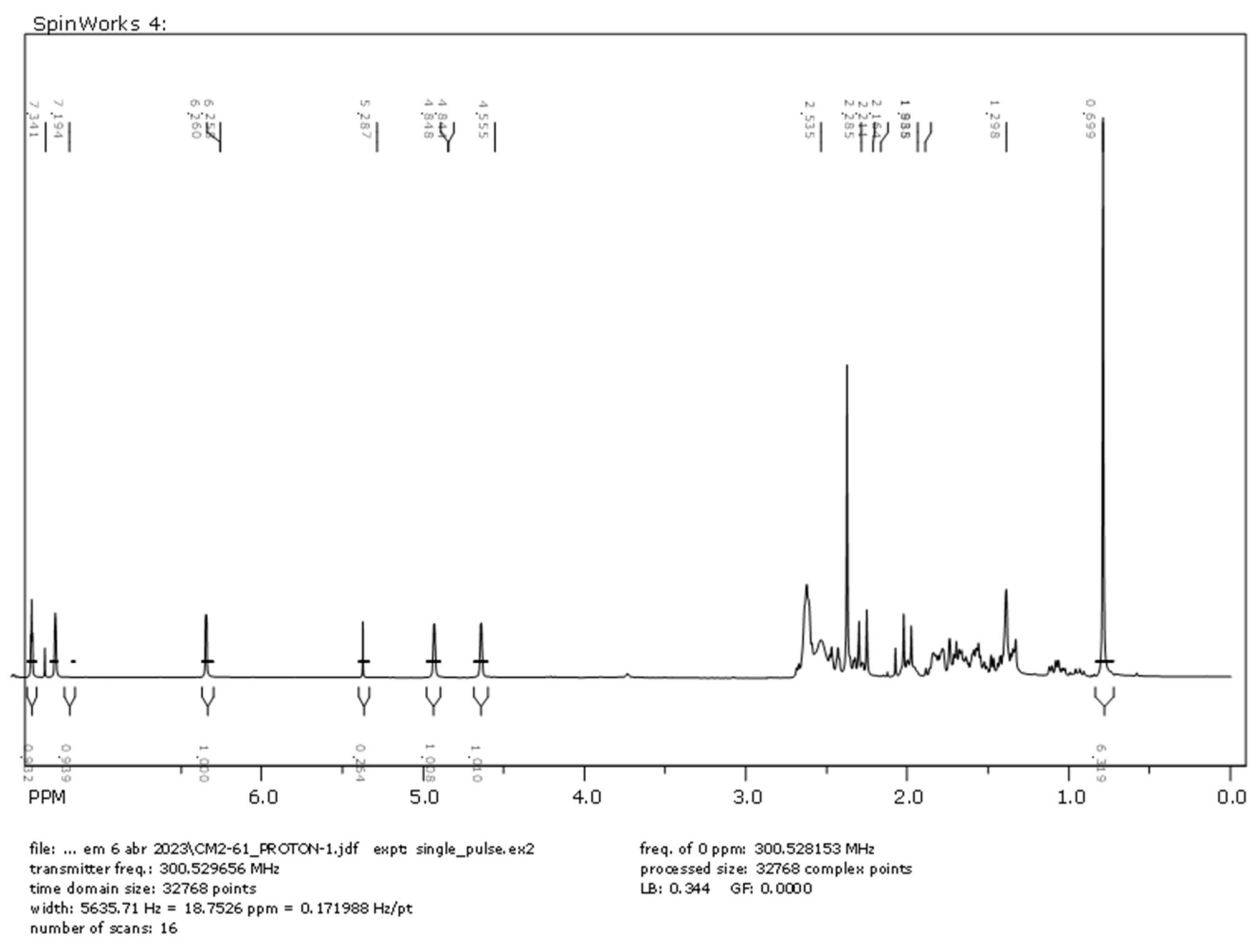

**Figure S25.**  $^1\text{H}$ -NMR (300 MHz,  $\text{CDCl}_3$ ) spectrum of **3a**

SpinWorks 4:

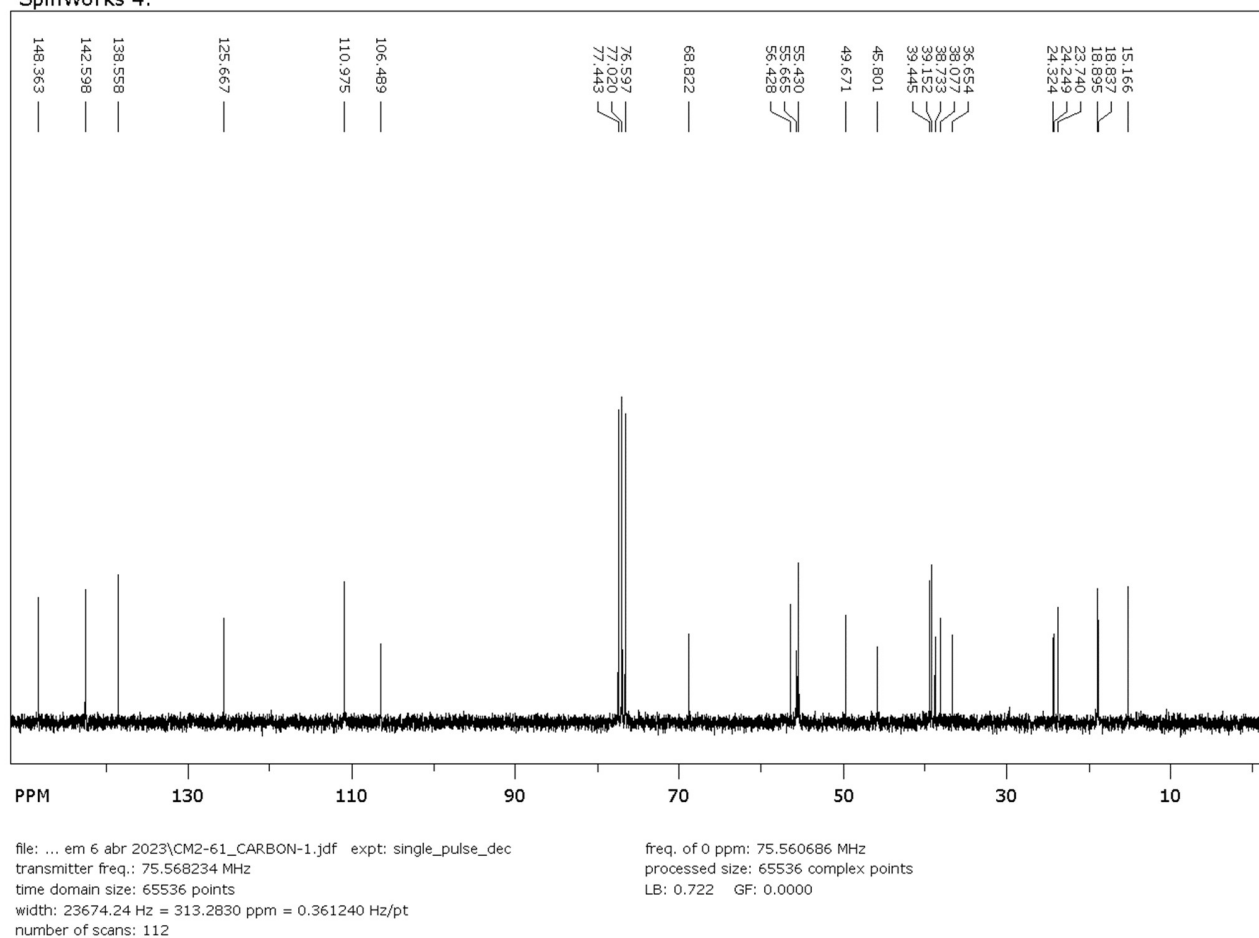

**Figure S26.**  $^{13}\text{C}$ -NMR (75 MHz,  $\text{CDCl}_3$ ) spectrum of **3a**

SpinWorks 4: single\_pulse

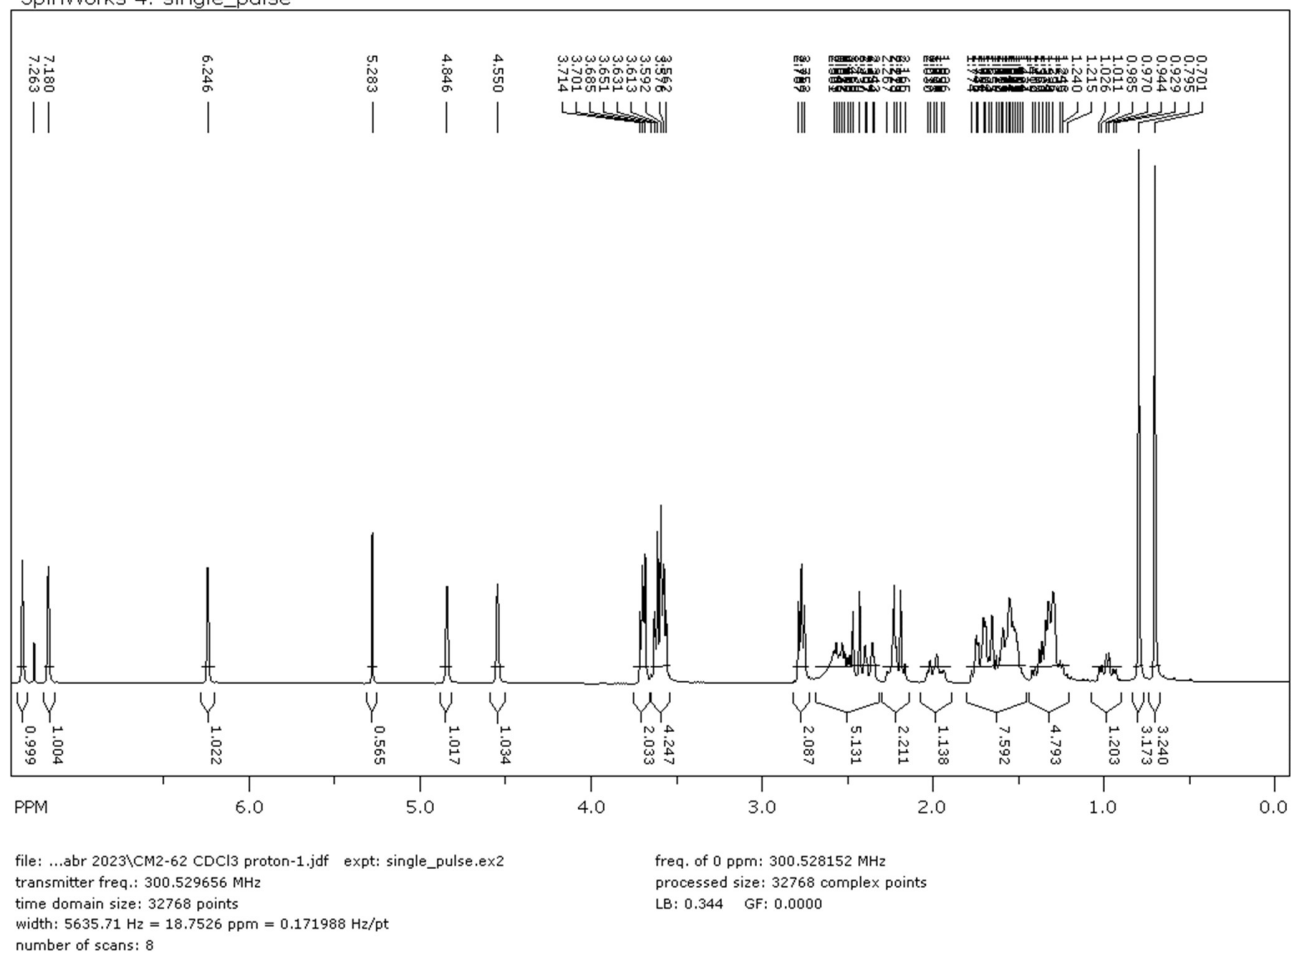

**Figure S27.**  $^1\text{H}$ -NMR (300 MHz,  $\text{CDCl}_3$ ) spectrum of **3b**



SpinWorks 4: single pulse decoupled gated NOE

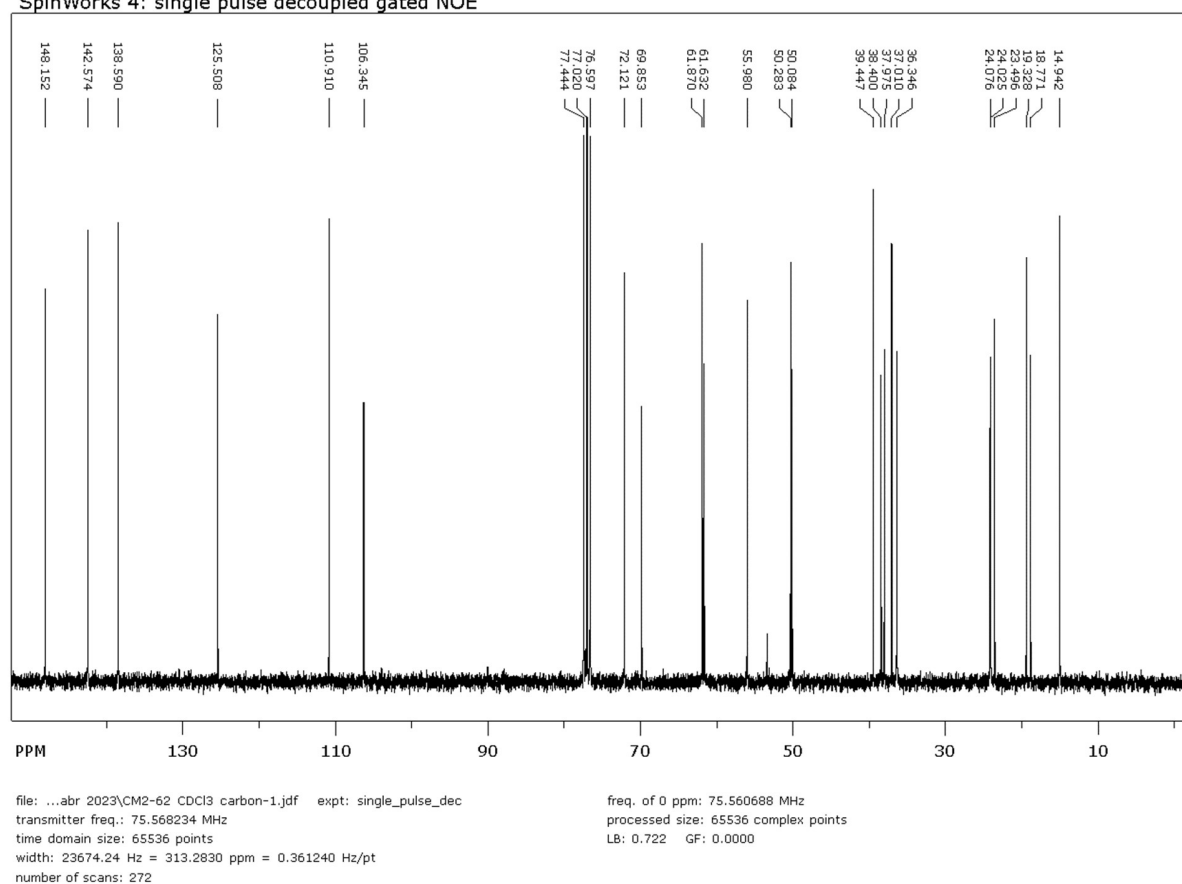

**Figure S28.**  $^{13}\text{C}$ -NMR (75 MHz,  $\text{CDCl}_3$ ) spectrum of **3b**
